# Supplementary material for: Internal Tooth Structure and Burial Practices: Insights into the Neolithic Necropolis of Gurgy (France, 5100-4000 cal. BC)
Source: PubMed Central journal article supplement (PMC4957824; doi:10.1371/journal.pone.0159688), 2016-07-22
Supplement: pone.0159688.s007.pdf [file pone.0159688.s007.pdf]

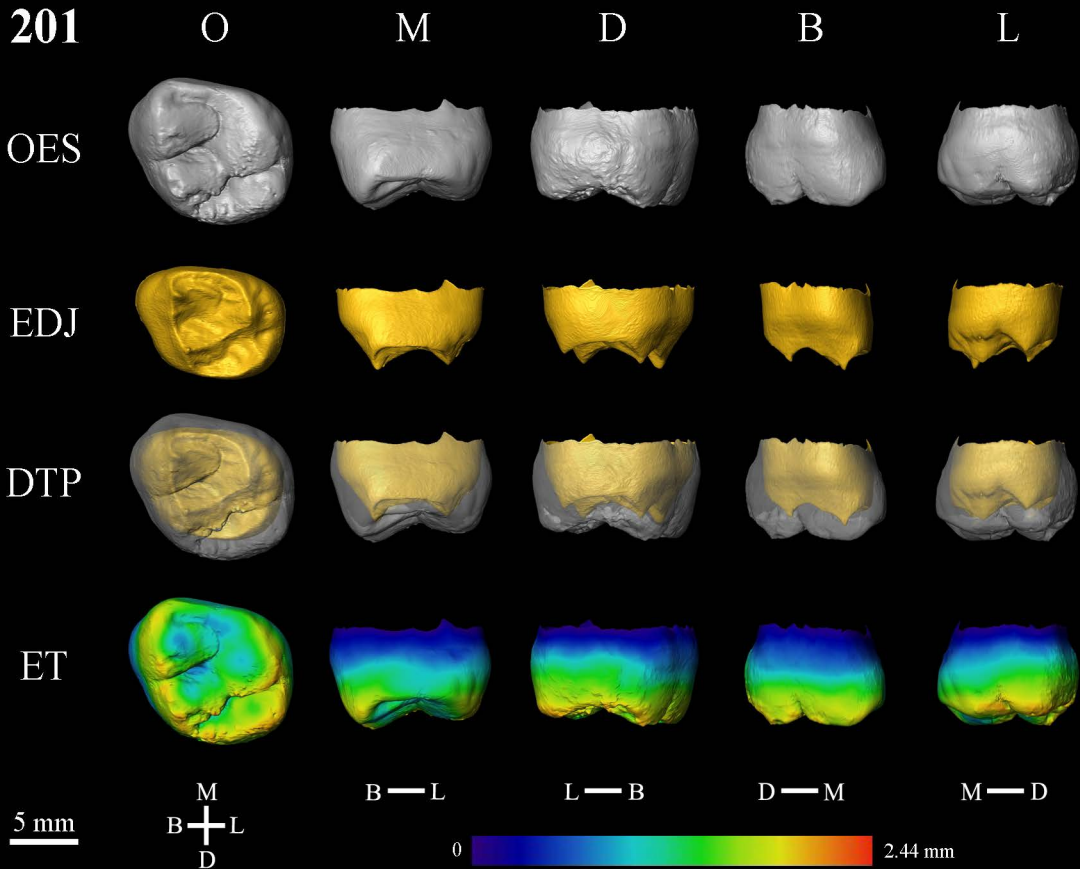

206

O

M

D

B

L

OES

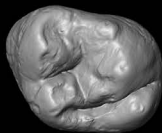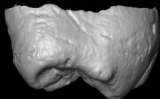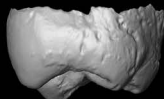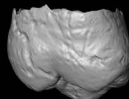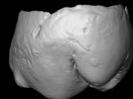

EDJ

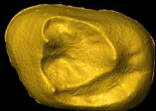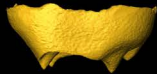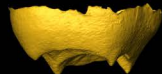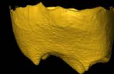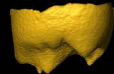

DTP

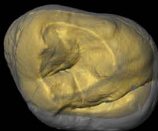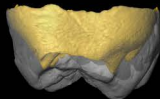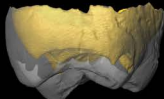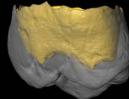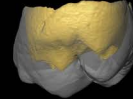

ET

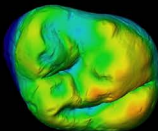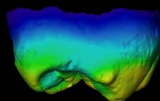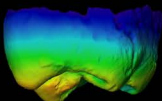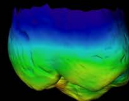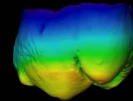

5 mm

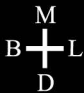

B — L

L — B

D — M

M — D

0

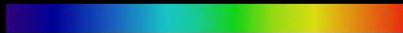

2.44 mm

213

O

M

D

B

L

OES

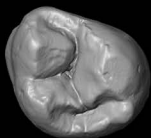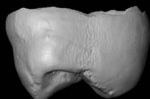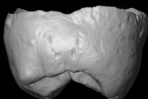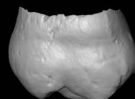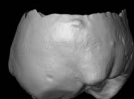

EDJ

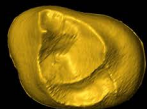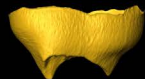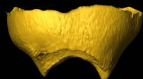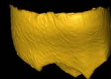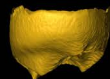

DTP

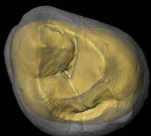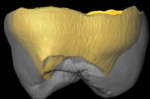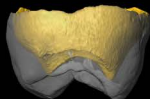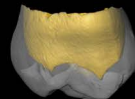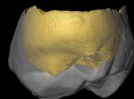

ET

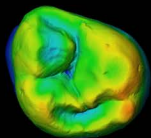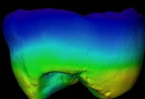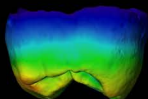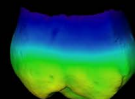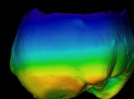

5 mm

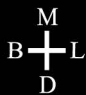

B — L

L — B

D — M

M — D

0

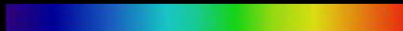

2.44 mm

**215A**

O

M

D

B

L

OES

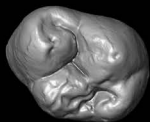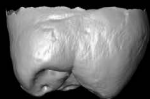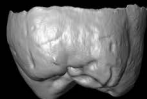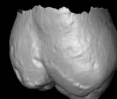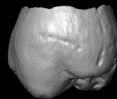

EDJ

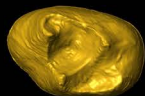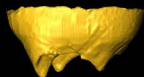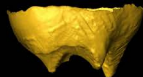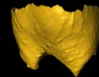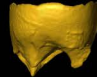

DTP

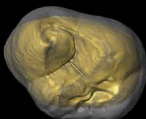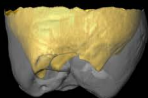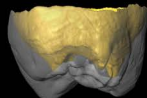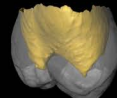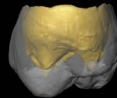

ET

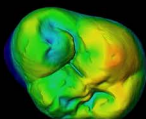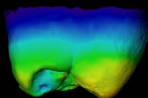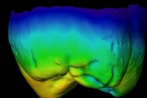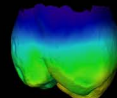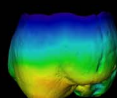5 mm

B — L

L — B

D — M

M — D

0



2.44 mm

**215B**

O

M

D

B

L

OES

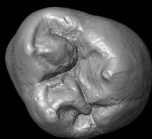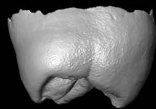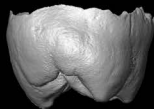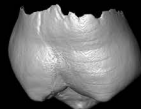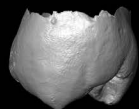

EDJ

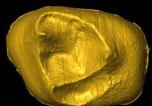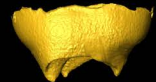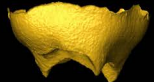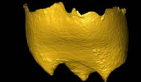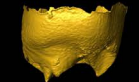

DTP

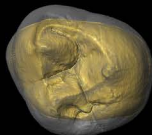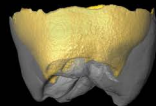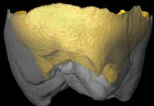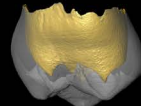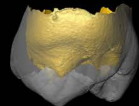

ET

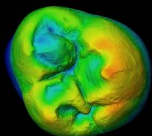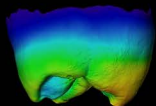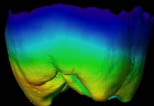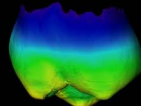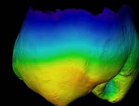

5 mm



B — L

L — B

D — M

M — D

0



2.44 mm

223

O

M

D

B

L

OES

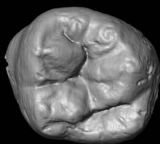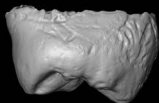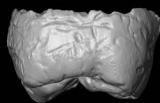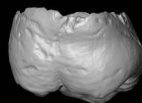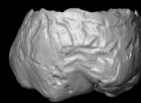

EDJ

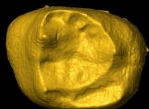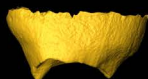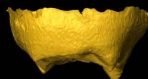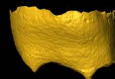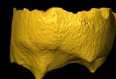

DTP

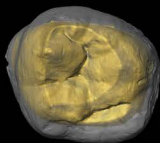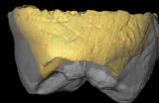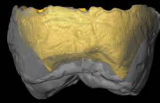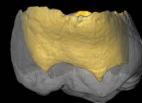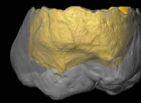

ET

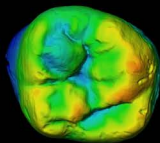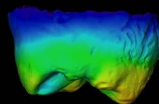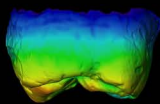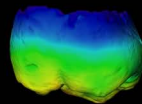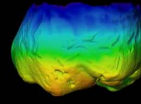

5 mm



B — L

L — B

D — M

M — D

0



2.44 mm

229

O

M

D

B

L

OES

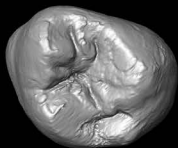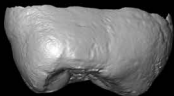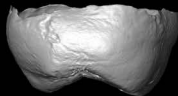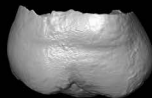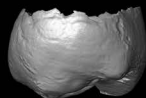

EDJ

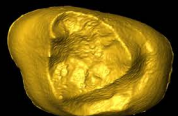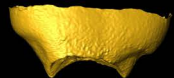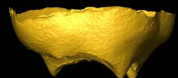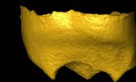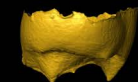

DTP

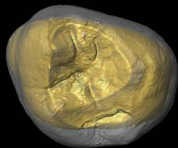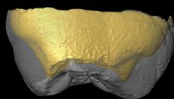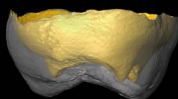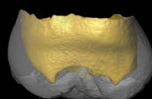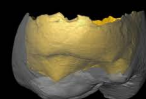

ET

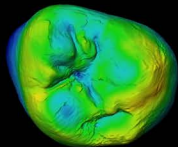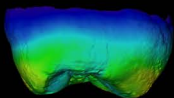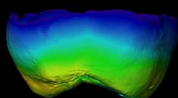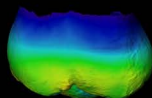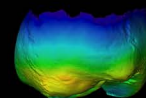

5 mm



B — L

L — B

D — M

M — D

0



2.44 mm

**243B**

O

M

D

B

L

OES

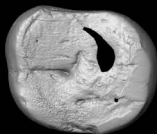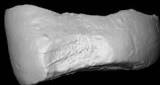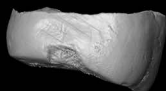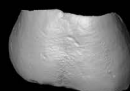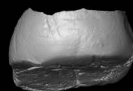

EDJ

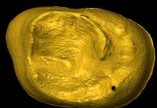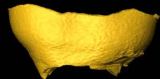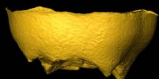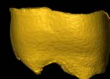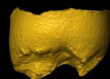

DTP

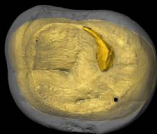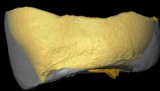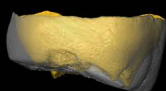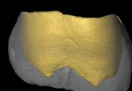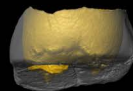

ET

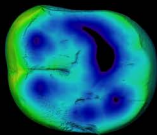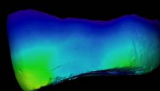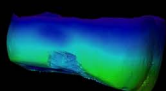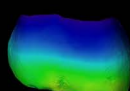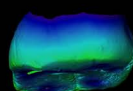

5 mm



B — L

L — B

D — M

M — D

0



2.44 mm



248 O M D B L

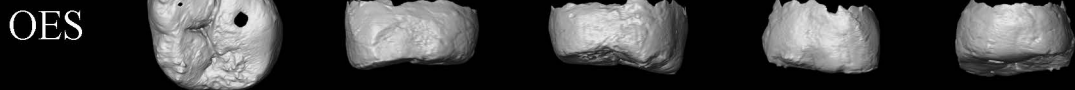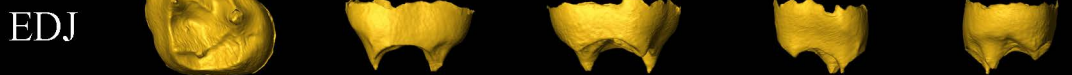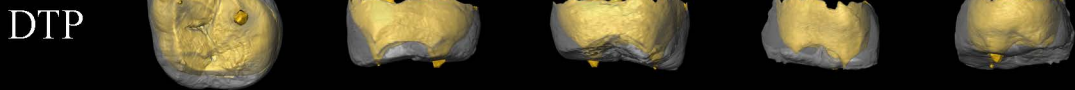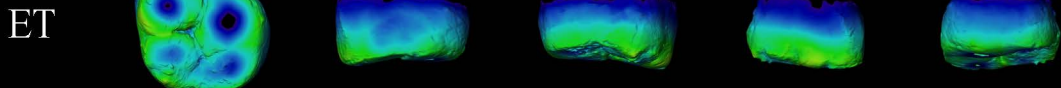

5 mm

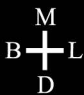

B — L

L — B

D — M

M — D

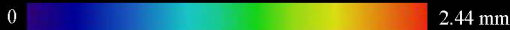

252

O

M

D

B

L

OES

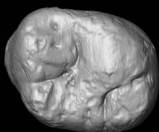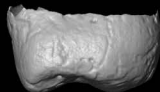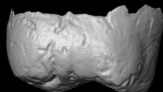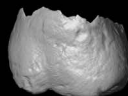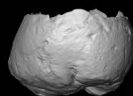

EDJ

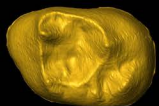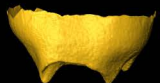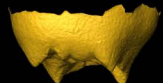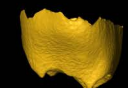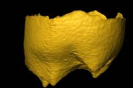

DTP

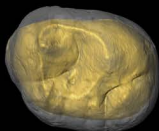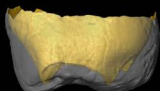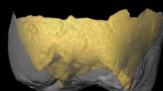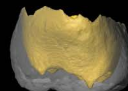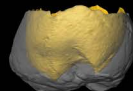

ET

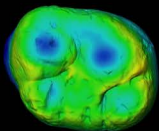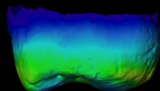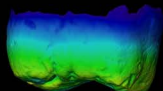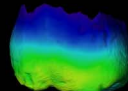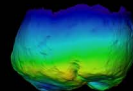

5 mm



B — L

L — B

D — M

M — D

0



2.44 mm

253

O

M

D

B

L

OES

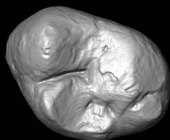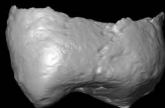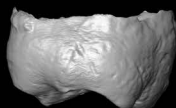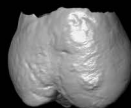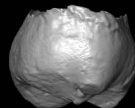

EDJ

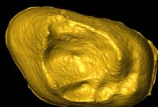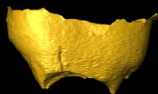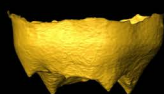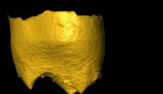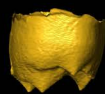

DTP

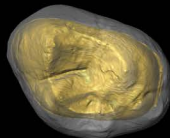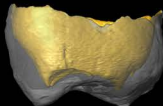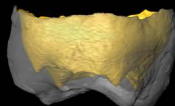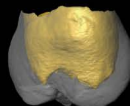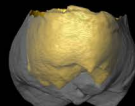

ET

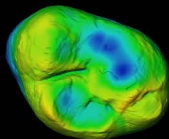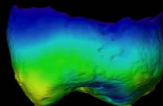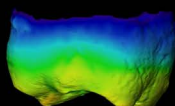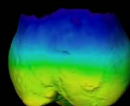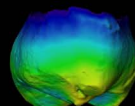

5 mm



B — L

L — B

D — M

M — D

0



2.44 mm

257

O

M

D

B

L

OES

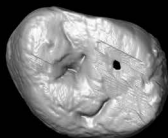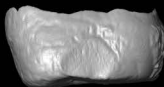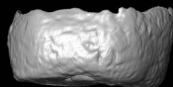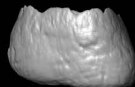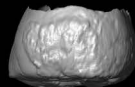

EDJ

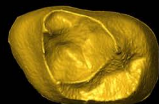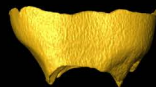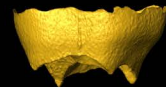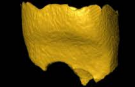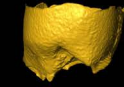

DTP

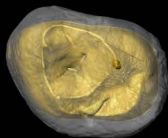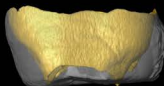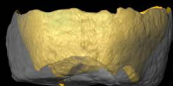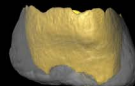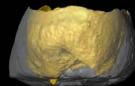

ET

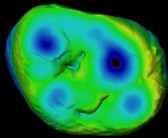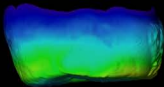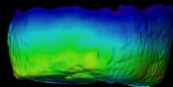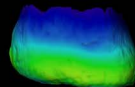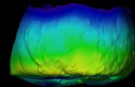

5 mm



B — L

L — B

D — M

M — D

0



2.44 mm

**264**

O

M

D

B

L

OES

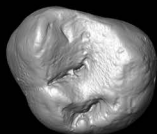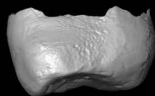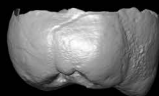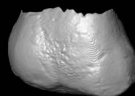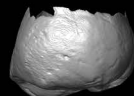

EDJ

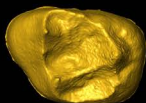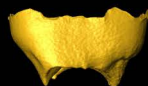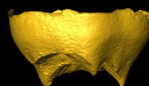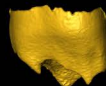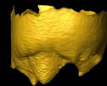

DTP

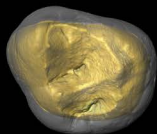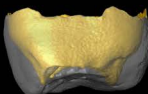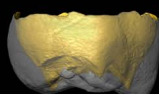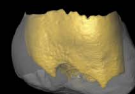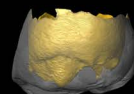

ET

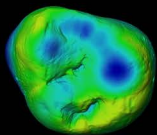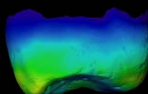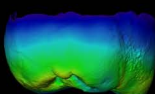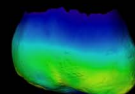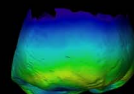5 mm

B — L

L — B

D — M

M — D

0



2.44 mm

277

O

M

D

B

L

OES

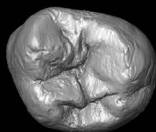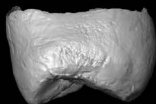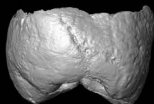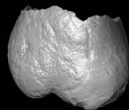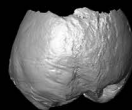

EDJ

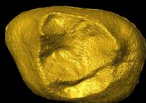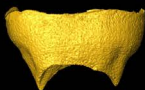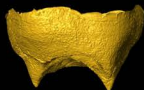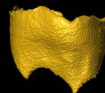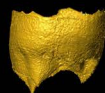

DTP

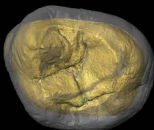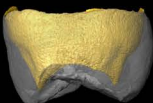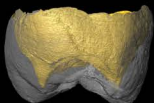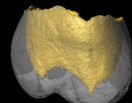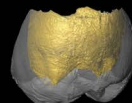

ET

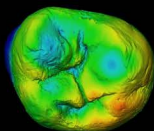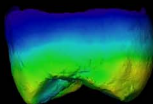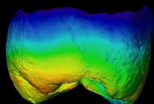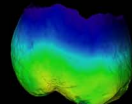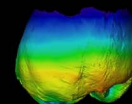

5 mm



B — L

L — B

D — M

M — D

0



2.44 mm

**289B**

O

M

D

B

L

OES

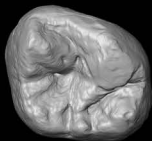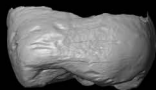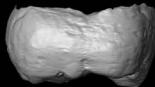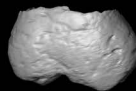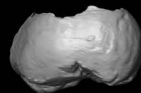

EDJ

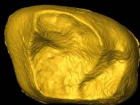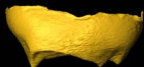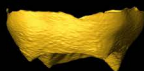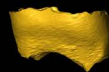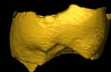

DTP

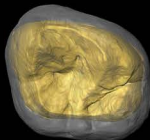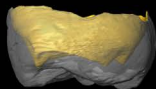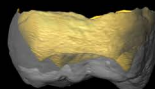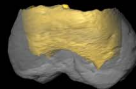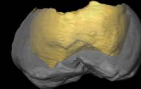

ET

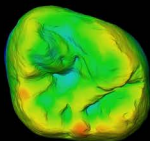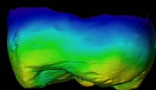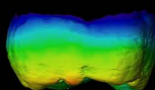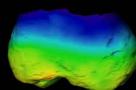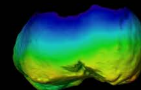

5 mm



B — L

L — B

D — M

M — D

0



2.44 mm

291

O

M

D

B

L

OES

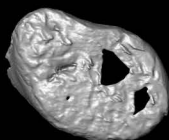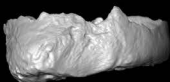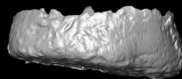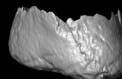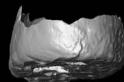

EDJ

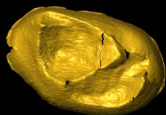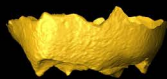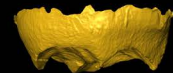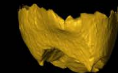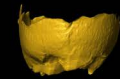

DTP

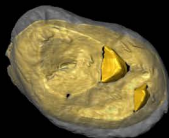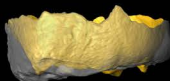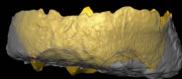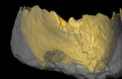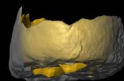

ET

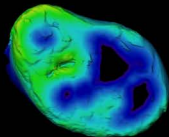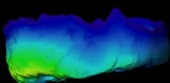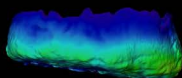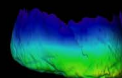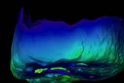

5 mm



B — L

L — B

D — M

M — D

0



2.44 mm



292

O

M

D

B

L

OES

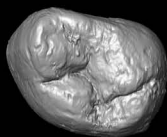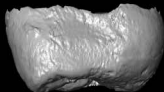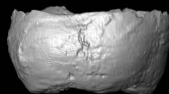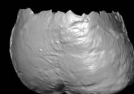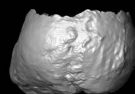

EDJ

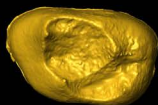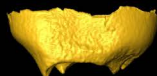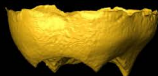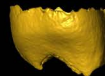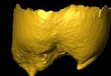

DTP

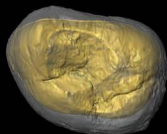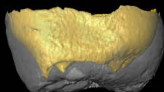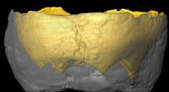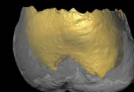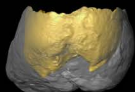

ET

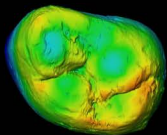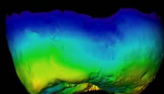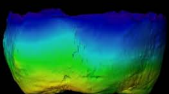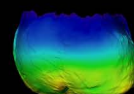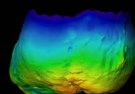

5 mm



B — L

L — B

D — M

M — D

0



2.44 mm

294

O

M

D

B

L

OES

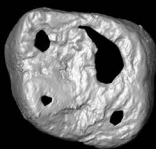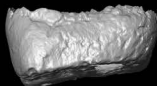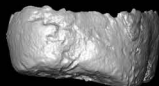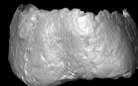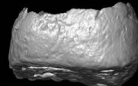

EDJ

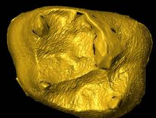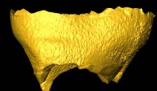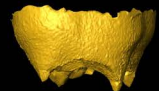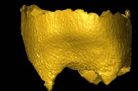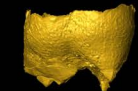

DTP

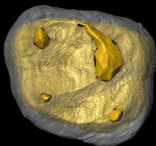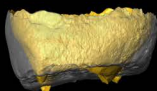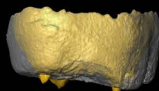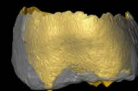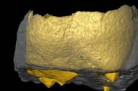

ET

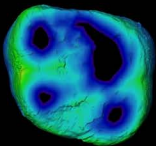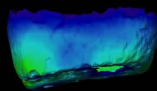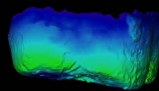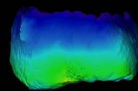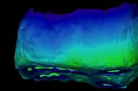

5 mm



B — L

L — B

D — M

M — D

0



2.44 mm

**301**

O

M

D

B

L

OES

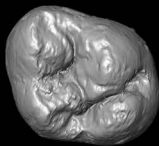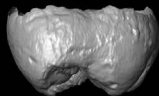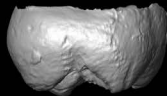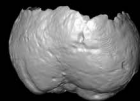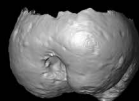

EDJ

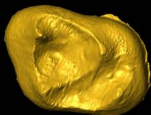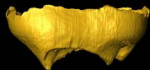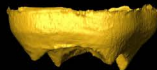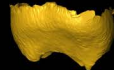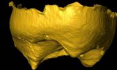

DTP

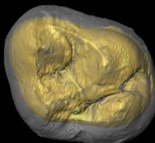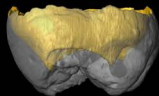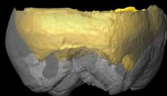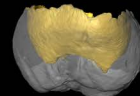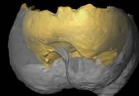

ET

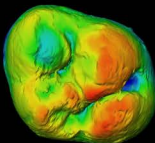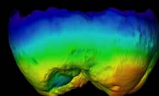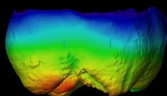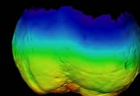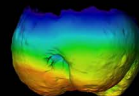

5 mm



B — L

L — B

D — M

M — D

0



2.44 mm

308

O

M

D

B

L

OES

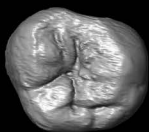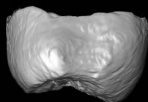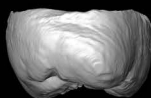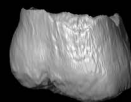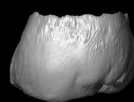

EDJ

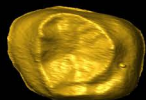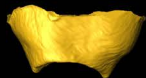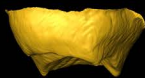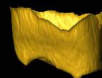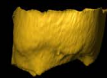

DTP

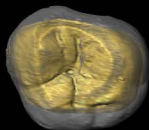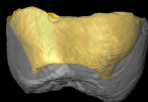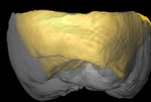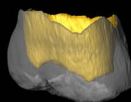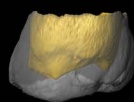

ET

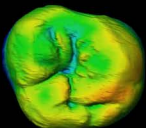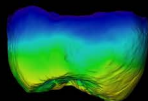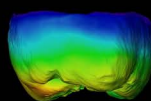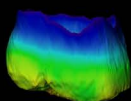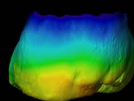

5 mm



B — L

L — B

D — M

M — D

0



2.44 mm
